# Supplementary material for: Tetrandrine alleviates cerebral ischemia/reperfusion injury by suppressing NLRP3 inflammasome activation via Sirt-1
Source: PeerJ. 2020 May 7;8:e9042. doi: 10.7717/peerj.9042 (PMC7211409; doi:10.7717/peerj.9042)
Supplement: Supplemental Information 2 [file peerj-08-9042-s002.xlsx]

## Sheet: Sheet1
Figure 2M：Iba-1 positive cells in hippocampus(cells/mm2)
Sham	Vehicle	MCAO+Tet
721	982	796
682	1011	843
656	881	671
Figure 2N：Cell with Iba-1 localization of NLRP3 (%)
Sham	Vehicle	MCAO+Tet
12.21	55.21	36.32
4.98	71.32	42.13
9.75	63.35	59.45
