# Supplementary material for: Tetrandrine alleviates cerebral ischemia/reperfusion injury by suppressing NLRP3 inflammasome activation via Sirt-1
Source: PeerJ. 2020 May 7;8:e9042. doi: 10.7717/peerj.9042 (PMC7211409; doi:10.7717/peerj.9042)
Supplement: Supplemental Information 3 [file peerj-08-9042-s003.xlsx]

## Sheet: Sheet1
Figure 3B:NLRP3 expression (fold of sham)
Sham	Vehicle	MCAO+Tet
0.85	2.34	1.54
1.22	1.95	1.62
0.93	2.15	1.39
Figure 3C:Cleaved caspase-1 expression (fold of sham)
Sham	Vehicle	MCAO+Tet
0.86	1.88	1.61
1.24	2.19	1.42
0.9	1.84	1.66
Figure 3D:IL-1β (pg/mg protein)
Sham	Vehicle	MCAO+Tet
8.75333	14.04	12.5667
10.4867	12.6533	11.44
10.2267	16.2067	12.8267
7.36667	16.9867	10.66
7.54	15.34	10.92
7.8	16.38	12.74
Figure 3E:IL-18 (pg/mg protein)
Sham	Vehicle	MCAO+Tet
10.549	15.7723	12.5974
11.778	15.9771	13.724
12.3925	17.1037	12.0853
8.91033	17.6158	12.8022
8.50066	17.7182	13.9288
9.32	15.2602	13.007
Figure 3G:Sirt-1 expression (fold of sham)
Sham	Vehicle	MCAO+Tet
0.88	0.43	0.74
1.19	0.49	0.71
0.93	0.54	0.65
